# Supplementary material for: Subclinical Infections with Crimean-Congo Hemorrhagic Fever Virus, Turkey
Source: PubMed Central journal article supplement (PMC3309668; doi:10.3201/eid1804.111374), 2012-04
Supplement: 11-1374-Techapp_1p.pdf [file 11-1374-Techapp_1p.pdf]

# Subclinical Infections with Crimean-Congo Hemorrhagic Fever Virus, Turkey

## Technical Appendix

Technical Appendix Table. Age group–specific seroprevalence rates for infection with CCHFV in the study population, Turkey, January–April 2009\*

| Age, y | No. persons at risk | Person-years at risk during 2002–2009 | No persons positive for CCHFV† | Expected no. infections |
|--------|---------------------|---------------------------------------|--------------------------------|-------------------------|
| 18–29  | 258,844             | 1,907,420                             | 2.308                          | 4,779                   |
| 30–39  | 167,738             | 1,281,808                             | 2.059                          | 2,763                   |
| 40–49  | 143,897             | 994,722                               | 1.844                          | 2,123                   |
| 50–59  | 116,650             | 872,738                               | 1.849                          | 1,725                   |
| 60–69  | 85,998              | 787,057                               | 2.656                          | 1,828                   |
| ≥70    | 78,334              | 632,846                               | 3.095                          | 1,939                   |
| Total  | 851,461             | 6,476,590                             | 2.262                          | 15,156                  |

\*Changes in the population caused by deaths and migration have been adjusted according to numbers obtained from Turkish Statistical Institute. CCHFV, Crimean-Congo hemorrhagic fever virus.

†Seropositivity per 1,000 persons/year.
